# Supplementary material for: Inhibiting mevalonate pathway enzymes increases stromal cell resilience to a cholesterol-dependent cytolysin
Source: PubMed Central journal article supplement (PMC5719056; doi:10.1038/s41598-017-17138-y), 2017-12-06
Supplement: 41598_2017_17138_MOESM1_ESM.pdf [file 41598_2017_17138_MOESM1_ESM.pdf]

## Supplementary Information

### **Inhibiting mevalonate pathway enzymes increases stromal cell resilience to a cholesterol-dependent cytolysin**

Sholeem Griffin<sup>1</sup>, Giulio Preta<sup>1,2</sup>, Iain Martin Sheldon<sup>1\*</sup>

<sup>1</sup>Swansea University Medical School, Swansea University, Swansea, SA2 8PP, United Kingdom

<sup>2</sup>Institute of Biochemistry, Life Science Center, Vilnius University, Vilnius, Lithuania.

\*Address correspondence to: Prof Iain Martin Sheldon, Institute of Life Science, College of Medicine, Swansea University, Singleton Park, Swansea, SA2 8PP, United Kingdom. E-mail: [i.m.sheldon@swansea.ac.uk](mailto:i.m.sheldon@swansea.ac.uk)

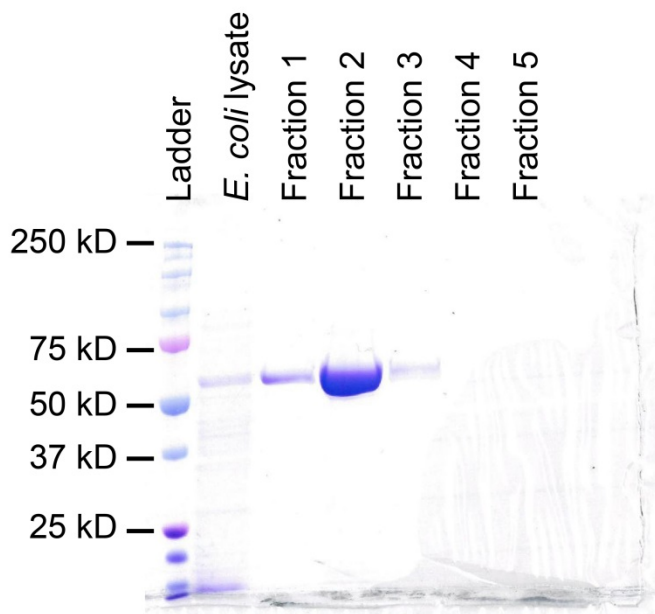

**Supplementary Figure S1. The purity of PLO protein.** The purity of recombinant PLO protein produced in *Escherichia coli* was evaluated using SDS-PAGE and Coomassie blue staining. Soluble fractions were diluted to 20  $\mu\text{g}/\mu\text{l}$  in a 1:1 ratio with Laemmli sample buffer and heated to 95°C for 10 min before loading onto 12% Mini-PROTEAN® TGX™ precast gel. A Dual colour standard ladder was used as marker, and a sample volume of 20  $\mu\text{l}$  was loaded in each well and run at 120V until the dye front reached the bottom of the gel. SDS-PAGE gels were stained overnight in Coomassie stain (50% (v/v) dH<sub>2</sub>O, 40 (v/v) methanol, 10% (v/v) acetic acid and 0.5% (w/v) Coomassie blue R250), and destained with destain solution (50% (v/v) dH<sub>2</sub>O, 40 (v/v) methanol and 10% (v/v) acetic acid) until clear. The second fraction was used in the present studies.

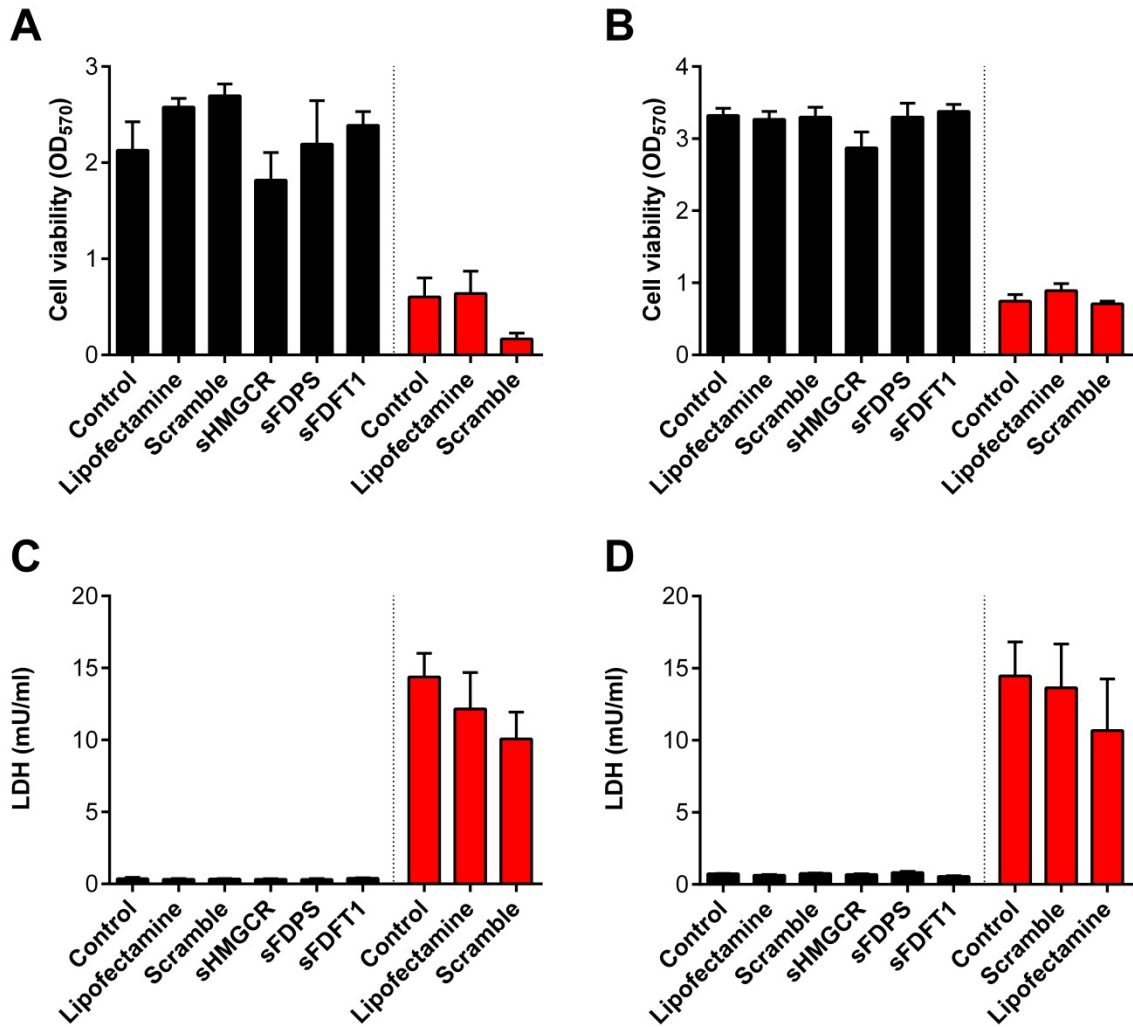

**Supplementary Figure S2. RNA interference of BESC and HESC.** The effect of siRNA transfection on cell viability was determined by incubating BESC from 4 animals (A, C) or HESC from 4 independent passages (B, D) for 48 h in control medium, medium containing lipofectamine, or transfecting cells with scramble siRNA or siRNA targeted against *HMGCR*, *FDPS* or *FDFT1*. Cells were challenged with control media (black bars) or media containing PLO (red bars) using 100 HU for BESC and 200 HU for HESC, for 2 h. Cell viability was determined by MTT assay (A, B), and cell permeability by measuring LDH in cell supernatants (C, D). Data are expressed as mean (SEM).
